# Supplementary material for: Targeting inhibition of prognosis-related nicotinamide metabolism genes, including poly (ADP-ribose) polymerase 9 (PARP-9) attenuates glioma progression
Source: Research Square preprint supplement (doi:10.21203/rs.3.rs-4618172/v1), 2024-07-19
Supplement: Supplementary file 1 [file 09d7455dff76dd8cc5dd5802.docx]

### Table 3. GSEA enrichment analysis results of TCGA-GBMLGG dataset key genes Prognosis Model high and low risk group genes.

| Description | setSize | enrichmentScore | NES | p.adjust | qvalue |
| --- | --- | --- | --- | --- | --- |
| REACTOME_INTERLEUKIN_10_SIGNALING | 41 | 0.801116435 | 2.560945731 | 6.16154E-09 | 4.24022E-09 |
| KEGG_JAK_STAT_SIGNALING_PATHWAY | 105 | 0.54944754 | 2.067259026 | 5.34668E-06 | 3.67945E-06 |
| BIOCARTA_NO2IL12_PATHWAY | 13 | 0.750147067 | 1.819808333 | 0.007511461 | 0.005169199 |
| WP_TGFBETA_RECEPTOR_SIGNALING | 50 | 0.489278789 | 1.630680097 | 0.026238367 | 0.018056585 |
| WP_OXIDATIVE_PHOSPHORYLATION | 52 | 0.472919084 | 1.588818875 | 0.029862148 | 0.02055038 |
| KEGG_APOPTOSIS | 81 | 0.430177654 | 1.558058055 | 0.026402736 | 0.0181697 |
| KEGG_LEISHMANIA_INFECTION | 67 | 0.741405477 | 2.600465565 | 6.16154E-09 | 4.24022E-09 |
| REACTOME_INTERLEUKIN_4_AND_INTERLEUKIN_13_SIGNALING | 95 | 0.686933171 | 2.556550042 | 6.16154E-09 | 4.24022E-09 |
| REACTOME_NEUTROPHIL_DEGRANULATION | 429 | 0.568151909 | 2.522383125 | 6.16154E-09 | 4.24022E-09 |
| WP_EBOLA_VIRUS_INFECTION_IN_HOST | 120 | 0.64656512 | 2.492132733 | 6.16154E-09 | 4.24022E-09 |
| PID_IL12_2PATHWAY | 57 | 0.717670672 | 2.451138204 | 6.16154E-09 | 4.24022E-09 |
| WP_OVERVIEW_OF_PROINFLAMMATORY_AND_PROFIBROTIC_MEDIATORS | 59 | 0.700535667 | 2.4145511 | 1.88812E-08 | 1.29935E-08 |
| REACTOME_SIGNALING_BY_INTERLEUKINS | 402 | 0.528838276 | 2.334290709 | 6.16154E-09 | 4.24022E-09 |
| WP_INFLAMMATORY_RESPONSE_PATHWAY | 23 | 0.827010116 | 2.321269981 | 3.9658E-07 | 2.72916E-07 |
| REACTOME_ASSEMBLY_OF_COLLAGEN_FIBRILS_AND_OTHER_MULTIMERIC_STRUCTURES | 57 | 0.677858682 | 2.31516401 | 1.64501E-07 | 1.13205E-07 |
| WP_PHOTODYNAMIC_THERAPYINDUCED_NFKB_SURVIVAL_SIGNALING | 30 | 0.74638968 | 2.248574149 | 8.22218E-06 | 5.6583E-06 |
| REACTOME_COSTIMULATION_BY_THE_CD28_FAMILY | 63 | 0.642559911 | 2.237982893 | 1.15342E-06 | 7.93756E-07 |
| PID_IL12_STAT4_PATHWAY | 28 | 0.738500125 | 2.196191039 | 2.52602E-05 | 1.73834E-05 |
| WP_INTERACTIONS_BETWEEN_IMMUNE_CELLS_AND_MICRORNAS_IN_TUMOR_MICROENVIRONMENT | 26 | 0.745671517 | 2.174836004 | 3.86457E-05 | 2.6595E-05 |
| WP_MEASLES_VIRUS_INFECTION | 114 | 0.564837779 | 2.164833926 | 1.29793E-07 | 8.93205E-08 |

GSEA， Gene Set Enrichment Analysis；GBMLGG，Glioma。
