# Supplementary material for: Targeting inhibition of prognosis-related nicotinamide metabolism genes, including poly (ADP-ribose) polymerase 9 (PARP-9) attenuates glioma progression
Source: Research Square preprint supplement (doi:10.21203/rs.3.rs-4618172/v1), 2024-07-19
Supplement: Supplementary file 2 [file 2d52b3cbb991f8d4c2011329.docx]

**Table S3. mRNA-miRNA interaction network nodes.**

| miRNA | mRNA |
| --- | --- |
| hsa-let-7a-5p | CDKN1A |
| hsa-let-7b-5p | CDKN1A |
| hsa-let-7c-5p | CDKN1A |
| hsa-let-7d-5p | CDKN1A |
| hsa-let-7e-5p | CDKN1A |
| hsa-let-7f-5p | CDKN1A |
| hsa-miR-17-5p | CDKN1A |
| hsa-miR-17-5p | CDKN1A |
| hsa-miR-20a-5p | CDKN1A |
| hsa-miR-20a-5p | CDKN1A |
| hsa-miR-22-3p | CDKN1A |
| hsa-miR-28-5p | CDKN1A |
| hsa-miR-28-5p | CDKN1A |
| hsa-miR-28-5p | CDKN1A |
| hsa-miR-93-5p | CDKN1A |
| hsa-miR-93-5p | CDKN1A |
| hsa-miR-98-5p | CDKN1A |
| hsa-miR-106a-5p | CDKN1A |
| hsa-miR-106a-5p | CDKN1A |
| hsa-miR-208a-3p | CDKN1A |
| hsa-miR-212-3p | CDKN1A |
| hsa-miR-224-5p | CDKN1A |
| hsa-let-7g-5p | CDKN1A |
| hsa-let-7i-5p | CDKN1A |
| hsa-miR-130a-3p | CDKN1A |
| hsa-miR-132-3p | CDKN1A |
| hsa-miR-106b-5p | CDKN1A |
| hsa-miR-106b-5p | CDKN1A |
| hsa-miR-301a-3p | CDKN1A |
| hsa-miR-130b-3p | CDKN1A |
| hsa-miR-365a-3p | CDKN1A |
| hsa-miR-365a-3p | CDKN1A |
| hsa-miR-370-3p | CDKN1A |
| hsa-miR-371a-3p | CDKN1A |
| hsa-miR-20b-5p | CDKN1A |
| hsa-miR-20b-5p | CDKN1A |
| hsa-miR-329-3p | CDKN1A |
| hsa-miR-485-5p | CDKN1A |
| hsa-miR-519c-3p | CDKN1A |
| hsa-miR-519c-3p | CDKN1A |
| hsa-miR-526b-3p | CDKN1A |
| hsa-miR-526b-3p | CDKN1A |
| hsa-miR-519b-3p | CDKN1A |
| hsa-miR-519b-3p | CDKN1A |
| hsa-miR-519d-3p | CDKN1A |
| hsa-miR-519d-3p | CDKN1A |
| hsa-miR-499a-5p | CDKN1A |
| hsa-miR-641 | CDKN1A |
| hsa-miR-454-3p | CDKN1A |
| hsa-miR-362-3p | CDKN1A |
| hsa-miR-423-5p | CDKN1A |
| hsa-miR-423-5p | CDKN1A |
| hsa-miR-423-5p | CDKN1A |
| hsa-miR-423-5p | CDKN1A |
| hsa-miR-423-5p | CDKN1A |
| hsa-miR-455-3p | CDKN1A |
| hsa-miR-455-3p | CDKN1A |
| hsa-miR-708-5p | CDKN1A |
| hsa-miR-708-5p | CDKN1A |
| hsa-miR-708-5p | CDKN1A |
| hsa-miR-665 | CDKN1A |
| hsa-miR-665 | CDKN1A |
| hsa-miR-665 | CDKN1A |
| hsa-miR-665 | CDKN1A |
| hsa-miR-665 | CDKN1A |
| hsa-miR-665 | CDKN1A |
| hsa-miR-301b-3p | CDKN1A |
| hsa-miR-208b-3p | CDKN1A |
| hsa-miR-642b-3p | CDKN1A |
| hsa-miR-4784 | CDKN1A |
| hsa-miR-642a-3p | CDKN1A |
| hsa-miR-29a-3p | NNMT |
| hsa-miR-29b-3p | NNMT |
| hsa-miR-29c-3p | NNMT |
| hsa-miR-26a-5p | PARP14 |
| hsa-miR-26a-5p | PARP14 |
| hsa-miR-26a-5p | PARP14 |
| hsa-miR-26b-5p | PARP14 |
| hsa-miR-26b-5p | PARP14 |
| hsa-miR-26b-5p | PARP14 |
| hsa-miR-214-3p | PARP14 |
| hsa-miR-214-3p | PARP14 |
| hsa-miR-124-3p | PARP14 |
| hsa-miR-124-3p | PARP14 |
| hsa-miR-125b-5p | PARP14 |
| hsa-miR-9-5p | PARP14 |
| hsa-miR-125a-5p | PARP14 |
| hsa-miR-346 | PARP14 |
| hsa-miR-495-3p | PARP14 |
| hsa-miR-495-3p | PARP14 |
| hsa-miR-495-3p | PARP14 |
| hsa-miR-495-3p | PARP14 |
| hsa-miR-498 | PARP14 |
| hsa-miR-498 | PARP14 |
| hsa-miR-498 | PARP14 |
| hsa-miR-513a-5p | PARP14 |
| hsa-miR-513a-5p | PARP14 |
| hsa-miR-513a-5p | PARP14 |
| hsa-miR-506-3p | PARP14 |
| hsa-miR-506-3p | PARP14 |
| hsa-miR-620 | PARP14 |
| hsa-miR-620 | PARP14 |
| hsa-miR-620 | PARP14 |
| hsa-miR-1185-5p | PARP14 |
| hsa-miR-1297 | PARP14 |
| hsa-miR-1297 | PARP14 |
| hsa-miR-1297 | PARP14 |
| hsa-miR-1270 | PARP14 |
| hsa-miR-1270 | PARP14 |
| hsa-miR-1270 | PARP14 |
| hsa-miR-4319 | PARP14 |
| hsa-miR-124-3p | PARP9 |
| hsa-miR-185-5p | PARP9 |
| hsa-miR-185-5p | PARP9 |
| hsa-miR-506-3p | PARP9 |
| hsa-miR-1276 | PARP9 |
| hsa-miR-4306 | PARP9 |
| hsa-miR-5590-3p | PARP9 |
| hsa-miR-1-3p | PNP |
| hsa-miR-1-3p | PNP |
| hsa-miR-206 | PNP |
| hsa-miR-613 | PNP |
| hsa-miR-101-3p | PTGS2 |
| hsa-miR-148a-3p | PTGS2 |
| hsa-miR-181a-5p | PTGS2 |
| hsa-miR-181a-5p | PTGS2 |
| hsa-miR-181a-5p | PTGS2 |
| hsa-miR-181a-5p | PTGS2 |
| hsa-miR-181b-5p | PTGS2 |
| hsa-miR-181b-5p | PTGS2 |
| hsa-miR-181b-5p | PTGS2 |
| hsa-miR-181b-5p | PTGS2 |
| hsa-miR-181c-5p | PTGS2 |
| hsa-miR-181c-5p | PTGS2 |
| hsa-miR-181c-5p | PTGS2 |
| hsa-miR-181c-5p | PTGS2 |
| hsa-miR-212-3p | PTGS2 |
| hsa-miR-212-3p | PTGS2 |
| hsa-miR-212-3p | PTGS2 |
| hsa-miR-128-3p | PTGS2 |
| hsa-miR-132-3p | PTGS2 |
| hsa-miR-132-3p | PTGS2 |
| hsa-miR-132-3p | PTGS2 |
| hsa-miR-143-3p | PTGS2 |
| hsa-miR-144-3p | PTGS2 |
| hsa-miR-152-3p | PTGS2 |
| hsa-miR-186-5p | PTGS2 |
| hsa-miR-186-5p | PTGS2 |
| hsa-miR-186-5p | PTGS2 |
| hsa-miR-186-5p | PTGS2 |
| hsa-miR-186-5p | PTGS2 |
| hsa-miR-186-5p | PTGS2 |
| hsa-miR-374a-5p | PTGS2 |
| hsa-miR-381-3p | PTGS2 |
| hsa-miR-148b-3p | PTGS2 |
| hsa-miR-410-3p | PTGS2 |
| hsa-miR-410-3p | PTGS2 |
| hsa-miR-410-3p | PTGS2 |
| hsa-miR-410-3p | PTGS2 |
| hsa-miR-410-3p | PTGS2 |
| hsa-miR-494-3p | PTGS2 |
| hsa-miR-494-3p | PTGS2 |
| hsa-miR-181d-5p | PTGS2 |
