# Supplementary material for: Targeting inhibition of prognosis-related nicotinamide metabolism genes, including poly (ADP-ribose) polymerase 9 (PARP-9) attenuates glioma progression
Source: Research Square preprint supplement (doi:10.21203/rs.3.rs-4618172/v1), 2024-07-19
Supplement: Supplementary file 3 [file 3834a6709c7c30248f7c1418.docx]

### Table 4. Patient Characteristics of GBMLGG patients in the TCGA datasets.

| Characteristics | Alive | Dead | P value |
| --- | --- | --- | --- |
| n | 213 | 130 |  |
| age, n (%) |  |  | < 0.001 |
| <=50 | 152 (44.3%) | 49 (14.3%) |  |
| >50 | 61 (17.8%) | 81 (23.6%) |  |
| gender, n (%) |  |  | 0.217 |
| MALE | 125 (36.4%) | 85 (24.8%) |  |
| FEMALE | 88 (25.7%) | 45 (13.1%) |  |

TCGA，The cancer genome atlas；GBMLGG，Glioma。
