# Supplementary material for: Targeting inhibition of prognosis-related nicotinamide metabolism genes, including poly (ADP-ribose) polymerase 9 (PARP-9) attenuates glioma progression
Source: Research Square preprint supplement (doi:10.21203/rs.3.rs-4618172/v1), 2024-07-19
Supplement: Supplementary file 4 [file 57f3a3f7f485951e707e950f.docx]

### Table 2. GO and KEGG enrichment analysis results of key genes .

| ONTOLOGY | ID | Description | GeneRatio | BgRatio | pvalue | p.adjust | qvalue |
| --- | --- | --- | --- | --- | --- | --- | --- |
| BP | GO:0072524 | pyridine-containing compound metabolic process | 4/8 | 38/18800 | 9.87292E-10 | 5.99286E-07 | 2.43186E-07 |
| BP | GO:0034356 | NAD biosynthesis via nicotinamide riboside salvage pathway | 3/8 | 10/18800 | 6.06052E-09 | 1.83937E-06 | 7.46401E-07 |
| BP | GO:0140289 | protein mono-ADP-ribosylation | 3/8 | 12/18800 | 1.11065E-08 | 2.24722E-06 | 9.11903E-07 |
| BP | GO:0019359 | nicotinamide nucleotide biosynthetic process | 3/8 | 28/18800 | 1.64859E-07 | 1.66782E-05 | 6.76788E-06 |
| BP | GO:0046496 | nicotinamide nucleotide metabolic process | 3/8 | 32/18800 | 2.49404E-07 | 1.68209E-05 | 6.82578E-06 |
| MF | GO:0016763 | pentosyltransferase activity | 4/8 | 49/18410 | 3.07551E-09 | 1.38398E-07 | 4.85606E-08 |
| MF | GO:1990404 | NAD+-protein ADP-ribosyltransferase activity | 3/8 | 20/18410 | 6.11856E-08 | 1.37667E-06 | 4.83044E-07 |
| MF | GO:0003950 | NAD+ ADP-ribosyltransferase activity | 3/8 | 23/18410 | 9.49942E-08 | 1.42491E-06 | 4.99969E-07 |
| MF | GO:0016757 | glycosyltransferase activity | 4/8 | 271/18410 | 3.06888E-06 | 3.45249E-05 | 1.2114E-05 |
| MF | GO:0003714 | transcription corepressor activity | 3/8 | 191/18410 | 5.92467E-05 | 0.00053322 | 0.000187095 |
| KEGG | hsa00760 | Nicotinate and nicotinamide metabolism | 3/5 | 36/8164 | 7.8282E-07 | 4.54036E-05 | 2.47206E-05 |
| KEGG | hsa01232 | Nucleotide metabolism | 2/5 | 85/8164 | 0.001049758 | 0.023756265 | 0.012934446 |
| KEGG | hsa05222 | Small cell lung cancer | 2/5 | 92/8164 | 0.001228772 | 0.023756265 | 0.012934446 |
| KEGG | hsa00230 | Purine metabolism | 2/5 | 128/8164 | 0.002364825 | 0.034289967 | 0.018669673 |
| KEGG | hsa04921 | Oxytocin signaling pathway | 2/5 | 154/8164 | 0.003405703 | 0.039506152 | 0.021509702 |

GO，Gene Ontology；BP，biological process；MF，molecular function；KEGG，Kyoto Encyclopedia of Genes and Genomes。
