# Supplementary material for: Targeting inhibition of prognosis-related nicotinamide metabolism genes, including poly (ADP-ribose) polymerase 9 (PARP-9) attenuates glioma progression
Source: Research Square preprint supplement (doi:10.21203/rs.3.rs-4618172/v1), 2024-07-19
Supplement: Supplementary file 5 [file 68f7170df991ea3a7947d91d.docx]

**Table S5. mRNA-TF interaction network nodes.**

| mRNA | TF |
| --- | --- |
| PARP10 | SPI1 |
| PARP10 | TP53 |
| PARP10 | TP63 |
| NT5C1A | FOS |
| NT5C1A | FOXA1 |
| NT5C1A | FOXA2 |
| NT5C1A | MAX |
| NT5C1A | NRF1 |
| NT5C1A | RAD21 |
| NT5C1A | RELA |
| NT5C1A | RFX1 |
| NT5C1A | SMARCA4 |
| NT5C1A | SMC1A |
| NT5C1A | SMC3 |
| NT5C1A | SP2 |
| NT5C1A | SPI1 |
| NT5C1A | STAG1 |
| NT5C1A | STAT3 |
| NT5C1A | TEAD4 |
| NT5C1A | TFAP2C |
| NT5C1A | USF1 |
| NT5C1A | CEBPB |
| NT5C1A | CTCF |
| PARP10 | CTCF |
| PARP10 | EBF1 |
| PARP10 | EGR1 |
| PARP10 | ELF1 |
| PARP10 | EP300 |
| PARP10 | ERG |
| PARP10 | ESR1 |
| PARP10 | ETS1 |
| PARP10 | ARNTL |
| PARP10 | FLI1 |
| PARP10 | FOS |
| PARP10 | FOSL2 |
| PARP10 | FOXA1 |
| PARP10 | FOXA2 |
| PARP10 | GATA2 |
| PARP10 | HNF4A |
| PARP10 | IRF1 |
| PARP10 | IRF4 |
| PARP10 | JUN |
| PARP10 | JUNB |
| PARP10 | JUND |
| PARP10 | KLF4 |
| PARP10 | KLF5 |
| PARP10 | MAFK |
| PARP10 | MAX |
| PARP10 | MAZ |
| PARP10 | MED1 |
| PARP10 | BHLHE40 |
| PARP10 | MYC |
| PARP10 | MYOD1 |
| PARP10 | NR2F1 |
| PARP10 | NR2F2 |
| PARP10 | NR3C1 |
| PARP10 | NRF1 |
| PARP10 | BRD3 |
| PARP10 | PGR |
| PARP10 | POLR2A |
| PARP10 | RAD21 |
| PARP10 | RBPJ |
| PARP10 | RCOR1 |
| PARP10 | RELA |
| PARP10 | SATB1 |
| PARP10 | SMAD3 |
| PARP10 | SMARCA2 |
| PARP10 | SMARCA4 |
| PARP10 | AR |
| PARP10 | SP1 |
| PARP10 | SPI1 |
| PARP10 | SS18-SSX |
| PARP10 | STAT3 |
| PARP10 | TAL1 |
| PARP10 | TCF12 |
| PARP10 | TEAD4 |
| PARP10 | TFAP2A |
| PARP10 | TFAP2C |
| PARP10 | TFAP4 |
| PARP10 | TP63 |
| PARP10 | ARID1A |
| PARP10 | USF1 |
| PARP10 | USF2 |
| PARP10 | VDR |
| PARP10 | CEBPA |
| PARP10 | CEBPB |
| PARP10 | CREBBP |
| PARP14 | YY1 |
| PARP14 | ZEB1 |
| PARP14 | EGR1 |
| PARP14 | ERG |
| PARP14 | FLI1 |
| PARP14 | IRF1 |
| PARP14 | STAT1 |
| PARP14 | STAT3 |
| PARP14 | TBP |
| PARP9 | ARID1A |
| PARP9 | BCL6 |
| PARP9 | BRD2 |
| PARP9 | CEBPA |
| PARP9 | CEBPB |
| PARP9 | CTCF |
| PARP9 | EBF1 |
| PARP9 | ELF1 |
| PARP9 | EP300 |
| PARP9 | ERG |
| PARP9 | ESR1 |
| PARP9 | ETS1 |
| PARP9 | FLI1 |
| PARP9 | FOS |
| PARP9 | FOSL1 |
| PARP9 | FOSL2 |
| PARP9 | FOXA1 |
| PARP9 | FOXA2 |
| PARP9 | HNF4A |
| PARP9 | IRF1 |
| PARP9 | IRF4 |
| PARP9 | JUN |
| PARP9 | JUNB |
| PARP9 | JUND |
| PARP9 | KMT2A |
| PARP9 | MAFK |
| PARP9 | MAX |
| PARP9 | MAZ |
| PARP9 | NANOG |
| PARP9 | NR2F1 |
| PARP9 | NR2F2 |
| PARP9 | NR3C1 |
| PARP9 | POLR2A |
| PARP9 | RELA |
| PARP9 | REST |
| PARP9 | SMARCA4 |
| PARP9 | SMARCB1 |
| PARP9 | SMARCC1 |
| PARP9 | SOX2 |
| PARP9 | SPI1 |
| PARP9 | STAT3 |
| PARP9 | TBP |
| PARP9 | TFAP2C |
| PARP9 | TFAP4 |
| PARP9 | TRIM28 |
| PNP | ATF3 |
| PNP | BHLHE40 |
| PNP | CEBPA |
| PNP | CEBPB |
| PNP | CLOCK |
| PNP | E2F1 |
| PNP | E2F6 |
| PNP | EGR1 |
| PNP | ELF1 |
| PNP | GRHL2 |
| PNP | IRF3 |
| PNP | MAX |
| PNP | MITF |
| PNP | MNT |
| PNP | MYC |
| PNP | MYCN |
| PNP | NELFA |
| PNP | NFYA |
| PNP | NR2F1 |
| PNP | NRF1 |
| PNP | POLR2A |
| PNP | SP1 |
| PNP | SPI1 |
| PNP | SREBF1 |
| PNP | TBP |
| PNP | USF1 |
| PNP | USF2 |
| PNP | YY1 |
| PTGS2 | FOXA1 |
| PTGS2 | GATA4 |
| PTGS2 | RELA |
| PTGS2 | SATB1 |
| PTGS2 | SPI1 |
| PTGS2 | STAT3 |
| PTGS2 | USF1 |
| PTGS2 | CEBPA |
| PTGS2 | CEBPB |
| PTGS2 | ERG |
