# Supplementary material for: Targeting inhibition of prognosis-related nicotinamide metabolism genes, including poly (ADP-ribose) polymerase 9 (PARP-9) attenuates glioma progression
Source: Research Square preprint supplement (doi:10.21203/rs.3.rs-4618172/v1), 2024-07-19
Supplement: Supplementary file 6 [file 808d794d4f7ad8a587037282.docx]

**Table S4. mRNA-RBP interaction network nodes.**

| mRNA | RBP |
| --- | --- |
| CDKN1A | AQR |
| CDKN1A | CDK1 |
| CDKN1A | CHTOP |
| CDKN1A | CPSF1 |
| CDKN1A | CPSF7 |
| CDKN1A | CSTF2T |
| CDKN1A | CTCF |
| CDKN1A | DDX3X |
| CDKN1A | DDX54 |
| CDKN1A | DDX6 |
| CDKN1A | DHX36 |
| CDKN1A | EIF4A3 |
| CDKN1A | ELAVL1 |
| CDKN1A | ELAVL3 |
| CDKN1A | EWSR1 |
| CDKN1A | FAM120A |
| CDKN1A | FUS |
| CDKN1A | G3BP1 |
| CDKN1A | HDLBP |
| CDKN1A | HNRNPA2B1 |
| CDKN1A | HNRNPC |
| CDKN1A | HNRNPK |
| CDKN1A | HNRNPM |
| CDKN1A | HNRNPU |
| CDKN1A | IGF2BP1 |
| CDKN1A | IGF2BP2 |
| CDKN1A | IGF2BP3 |
| CDKN1A | LARP4B |
| CDKN1A | LIN28B |
| CDKN1A | METTL1 |
| CDKN1A | MOV10 |
| CDKN1A | NUDT21 |
| CDKN1A | PCBP2 |
| CDKN1A | PRPF4 |
| CDKN1A | PRPF8 |
| CDKN1A | PTBP1 |
| CDKN1A | PUM1 |
| CDKN1A | RBFOX2 |
| CDKN1A | RBM15 |
| CDKN1A | RBM20 |
| CDKN1A | RBM39 |
| CDKN1A | RBM47 |
| CDKN1A | RBMX |
| CDKN1A | RC3H1 |
| CDKN1A | RNPS1 |
| CDKN1A | SCAF4 |
| CDKN1A | SCAF8 |
| CDKN1A | SF3B4 |
| CDKN1A | SOX2 |
| CDKN1A | SP1 |
| CDKN1A | SRSF1 |
| CDKN1A | SRSF7 |
| CDKN1A | SRSF9 |
| CDKN1A | TARDBP |
| CDKN1A | TIA1 |
| CDKN1A | TRMT10A |
| CDKN1A | U2AF1 |
| CDKN1A | U2AF2 |
| CDKN1A | UPF1 |
| CDKN1A | WDR4 |
| CDKN1A | YTHDC1 |
| CDKN1A | YTHDF1 |
| CDKN1A | YTHDF2 |
| CDKN1A | YTHDF3 |
| NNMT | ALYREF |
| NNMT | CSTF2 |
| NNMT | CTCF |
| NNMT | ELAVL1 |
| NNMT | EWSR1 |
| NNMT | HNRNPC |
| NNMT | IGF2BP3 |
| NNMT | NUDT16L1 |
| NNMT | NXF1 |
| NNMT | PTBP1 |
| NNMT | RBM7 |
| NNMT | RNPS1 |
| NNMT | U2AF2 |
| NNMT | YTHDC1 |
| NNMT | YTHDF1 |
| NNMT | YTHDF2 |
| PARP10 | ALYREF |
| PARP10 | CSTF2 |
| PARP10 | CSTF2T |
| PARP10 | ELAVL1 |
| PARP10 | GEMIN5 |
| PARP10 | HNRNPK |
| PARP10 | HNRNPL |
| PARP10 | IGF2BP1 |
| PARP10 | NOVA1 |
| PARP10 | NXF1 |
| PARP10 | PRPF8 |
| PARP10 | RBM39 |
| PARP10 | RBM4 |
| PARP10 | SF3B4 |
| PARP10 | SRSF1 |
| PARP10 | U2AF1 |
| PARP10 | U2AF2 |
| PARP14 | CHTOP |
| PARP14 | CSTF2 |
| PARP14 | CTCF |
| PARP14 | DDX3X |
| PARP14 | DDX54 |
| PARP14 | ELAVL1 |
| PARP14 | EWSR1 |
| PARP14 | EXOSC5 |
| PARP14 | FMR1 |
| PARP14 | FXR1 |
| PARP14 | FXR2 |
| PARP14 | G3BP1 |
| PARP14 | HNRNPA2B1 |
| PARP14 | HNRNPC |
| PARP14 | HNRNPK |
| PARP14 | HNRNPL |
| PARP14 | HNRNPM |
| PARP14 | IGF2BP1 |
| PARP14 | IGF2BP2 |
| PARP14 | IGF2BP3 |
| PARP14 | LIN28B |
| PARP14 | MOV10 |
| PARP14 | PCBP2 |
| PARP14 | PTBP1 |
| PARP14 | RBM39 |
| PARP14 | RBM4 |
| PARP14 | SCAF4 |
| PARP14 | SRSF1 |
| PARP14 | SRSF7 |
| PARP14 | TARDBP |
| PARP14 | U2AF1 |
| PARP14 | U2AF2 |
| PARP14 | UPF1 |
| PARP14 | YTHDF2 |
| PARP9 | ALYREF |
| PARP9 | CHTOP |
| PARP9 | CTCF |
| PARP9 | DDX54 |
| PARP9 | DHX36 |
| PARP9 | ELAVL1 |
| PARP9 | HNRNPL |
| PARP9 | IGF2BP3 |
| PARP9 | LIN28B |
| PARP9 | RBM39 |
| PARP9 | RNPS1 |
| PARP9 | SOX2 |
| PARP9 | TARDBP |
| PARP9 | U2AF2 |
| PNP | ALYREF |
| PNP | CELF2 |
| PNP | CPSF6 |
| PNP | CTCF |
| PNP | DDX3X |
| PNP | DHX36 |
| PNP | EIF4A3 |
| PNP | ELAVL1 |
| PNP | EWSR1 |
| PNP | G3BP1 |
| PNP | GRWD1 |
| PNP | HDLBP |
| PNP | HNRNPA2B1 |
| PNP | HNRNPC |
| PNP | IGF2BP2 |
| PNP | LIN28B |
| PNP | METTL1 |
| PNP | MSI2 |
| PNP | NUDT21 |
| PNP | NXF1 |
| PNP | PRPF8 |
| PNP | PTBP1 |
| PNP | RBFOX2 |
| PNP | RBM10 |
| PNP | RBM15B |
| PNP | RBM7 |
| PNP | RBMX |
| PNP | RBPMS |
| PNP | RNPS1 |
| PNP | SCAF4 |
| PNP | SCAF8 |
| PNP | SLBP |
| PNP | SND1 |
| PNP | SOX2 |
| PNP | SRSF1 |
| PNP | SRSF2 |
| PNP | SRSF7 |
| PNP | TARDBP |
| PNP | U2AF1 |
| PNP | U2AF2 |
| PNP | UPF1 |
| PNP | WDR4 |
| PNP | YTHDC1 |
| PNP | YTHDF1 |
| PNP | YTHDF2 |
| PNP | YTHDF3 |
| PNP | ZCCHC14 |
| PTGS2 | ACIN1 |
| PTGS2 | EIF4A3 |
| PTGS2 | ELAVL1 |
| PTGS2 | HNRNPA2B1 |
| PTGS2 | HNRNPL |
| PTGS2 | PTBP1 |
| PTGS2 | RBFOX1 |
| PTGS2 | RBM47 |
| PTGS2 | RNPS1 |
| PTGS2 | SRSF3 |
| PTGS2 | TRIM25 |
| PTGS2 | UPF1 |
